# Supplementary material for: Solar reduced graphene oxide decorated with manganese dioxide nanostructures for brackish water desalination using asymmetric capacitive deionization
Source: Royal Society of Chemistry journal article supplement (doi:10.1039/d3cp02984k), 2023-01-01
Supplement: d3cp02984k1.pdf [file d3cp02984k1.pdf]

## Supplementary information

### Synthesis of graphene oxide (GO)

Graphene oxide (GO) had been synthesized by the reaction of the graphite flake and oxidizing agents by Hummer's method. Firstly, graphite flake (500 mg) and sodium nitrate (500 mg) were added in concentrated sulphuric acid (12.5 ml) and stirred for 2 h in ice bath at the temperature of 0-5°C. Potassium permanganate (1.5 g) was then added to the mixture slowly, while controlling temperature up to 15°C. The as-prepared mixture was agitated for 48 h in ambient temperature to attain the maximum possible oxidation of graphite. Deionized water was then added to the thick slurry obtained at room temperature. Further hydrogen peroxide (2.5 ml) was added to discontinue the reaction. By addition of hydrogen peroxide, the color of the reaction mixture quickly changed to yellow signifying the oxidation of graphite. The reaction mixture was then washed several times with 10% hydrochloric acid solution and deionized water until the neutral pH is obtained. The suspension was discharged to a petri dish at ambient temperature to obtain dried sheet of GO.

Figure S1-S3 show the CV curves of  $\text{MnO}_2$ , SRGO and SRGO- $\text{MnO}_2$  at several scan rates. All the CV curves manifested quasi-rectangular shape indicating the electrical double layer (EDL) behavior along with the contribution of faradaic redox reaction for charge storage. For each material, the current response was higher at elevated scan rates, indicating superior electrochemical performance.

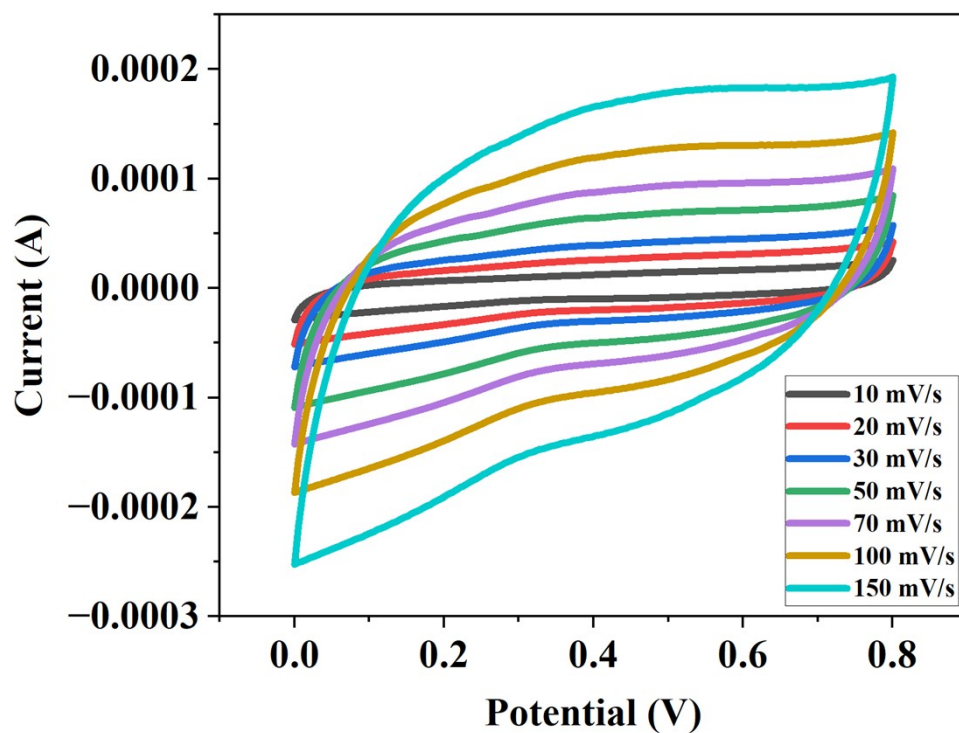

Figure S 1. CVs at various scan rates for MnO<sub>2</sub>

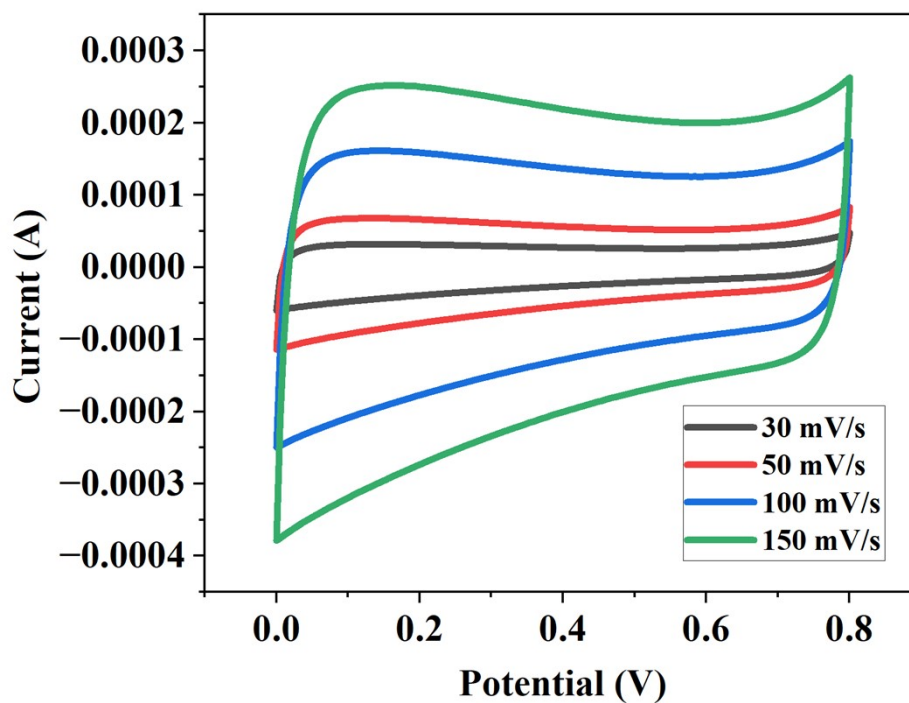

Figure S 2. CVs at various scan rates for SRGO

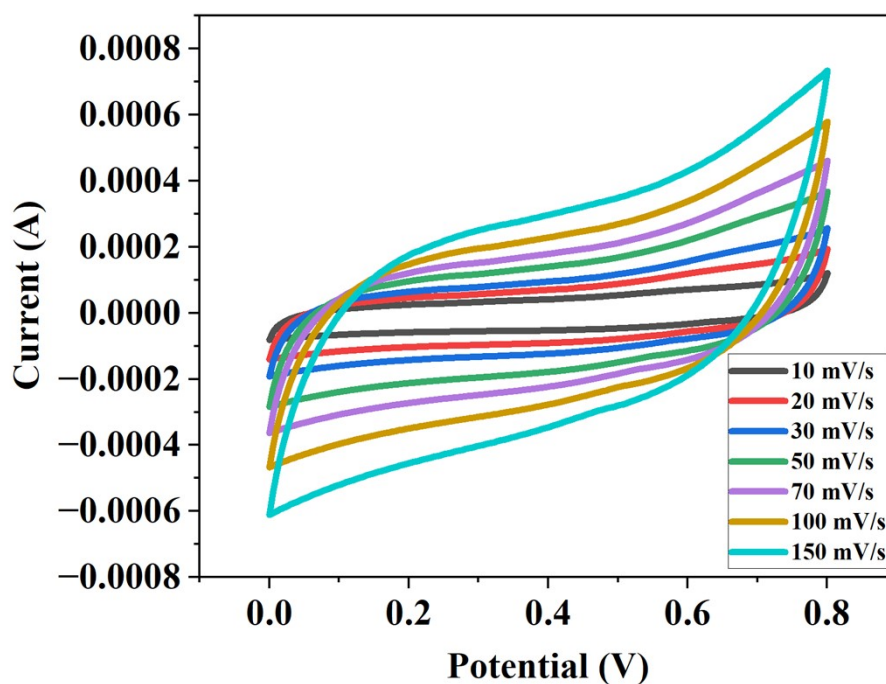

**Figure S 3. CVs at various scan rates for SRGO-MnO<sub>2</sub> composite**

Figure S4-S6 displays GCD curves for MnO<sub>2</sub>, SRGO and SRGO-MnO<sub>2</sub> at different current densities. The GCD curves for the three materials show symmetric triangular shape, which suggest EDL behaviour of charge storage. With the increase in current density, the discharge time decreases, and thus the specific capacitance. The decrease in specific capacitance was attributed to the less diffusion of electrolyte ions in the porous structure of the materials at elevated current densities [1].

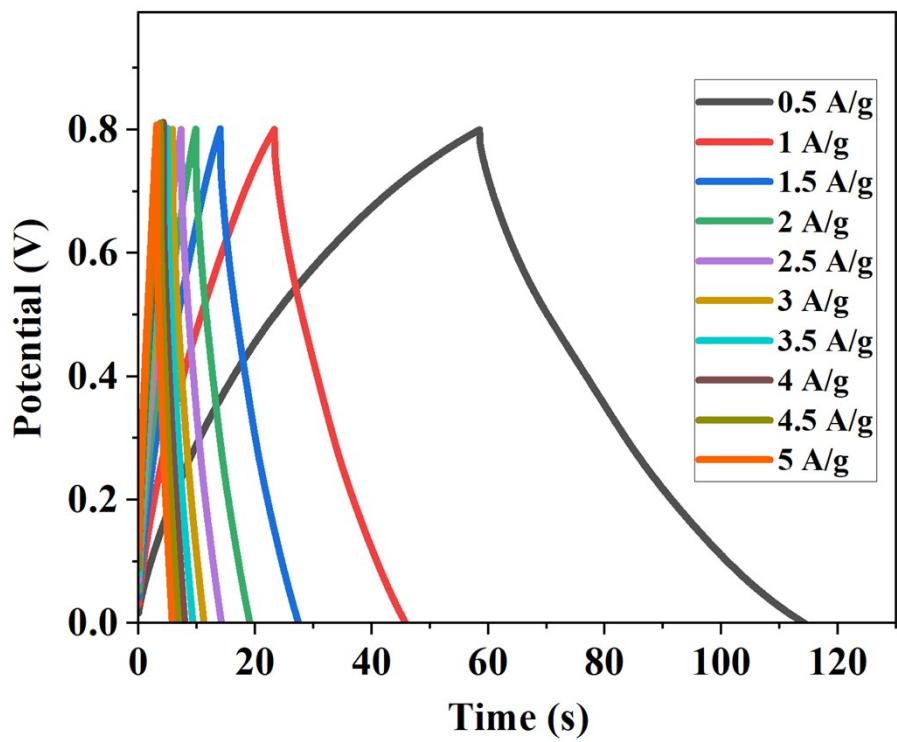

Figure S 4. GCDs at various current densities for MnO<sub>2</sub>

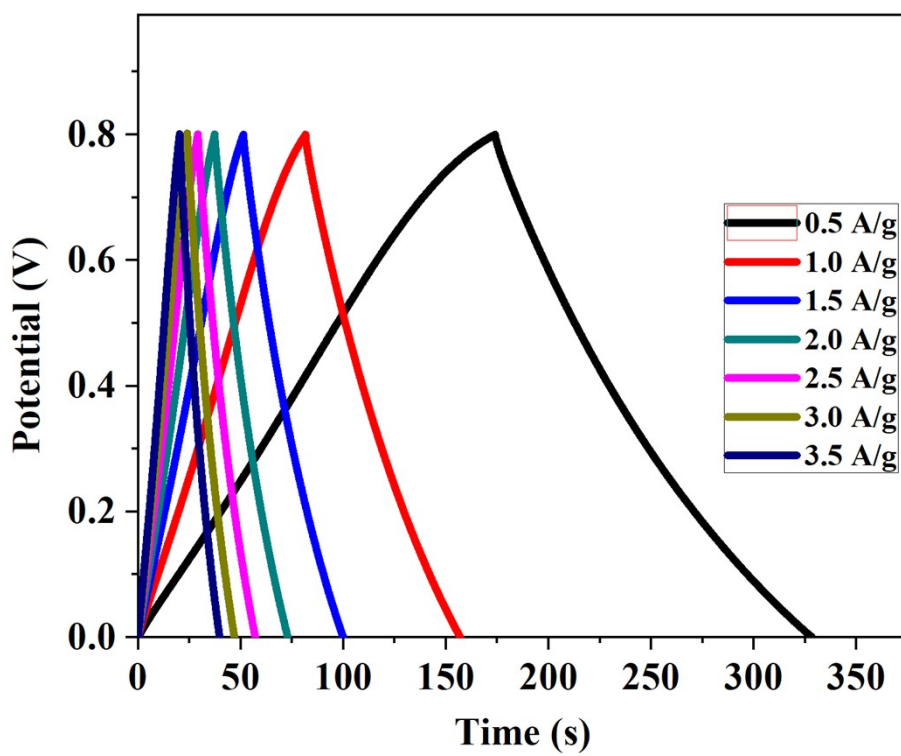

Figure S 5. GCDs at various current densities for SRGO

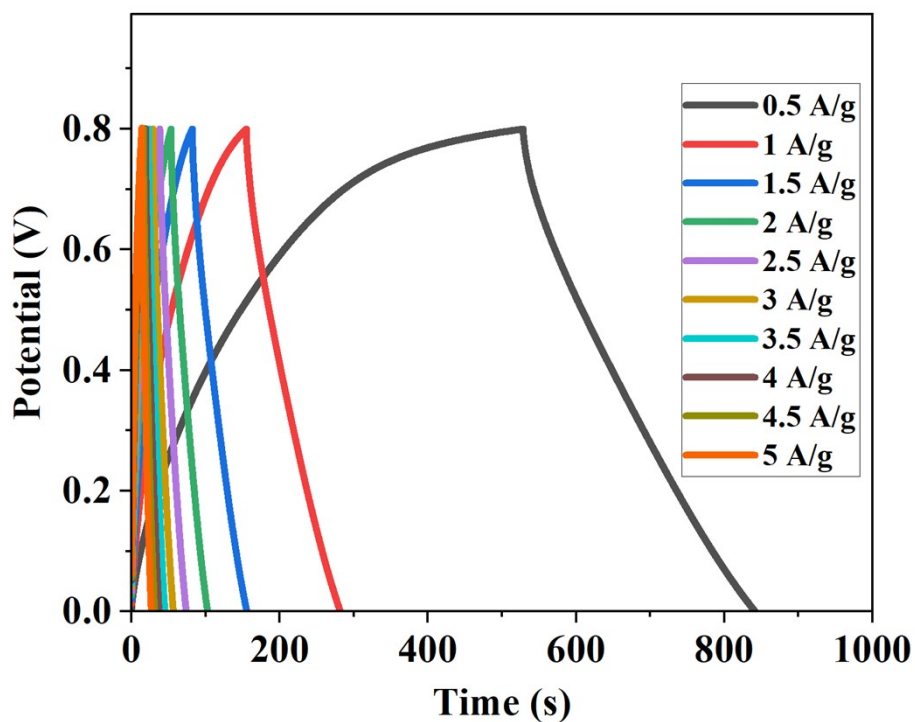

Figure S 6. GCDs at various current densities for SRGO-MnO<sub>2</sub> composite

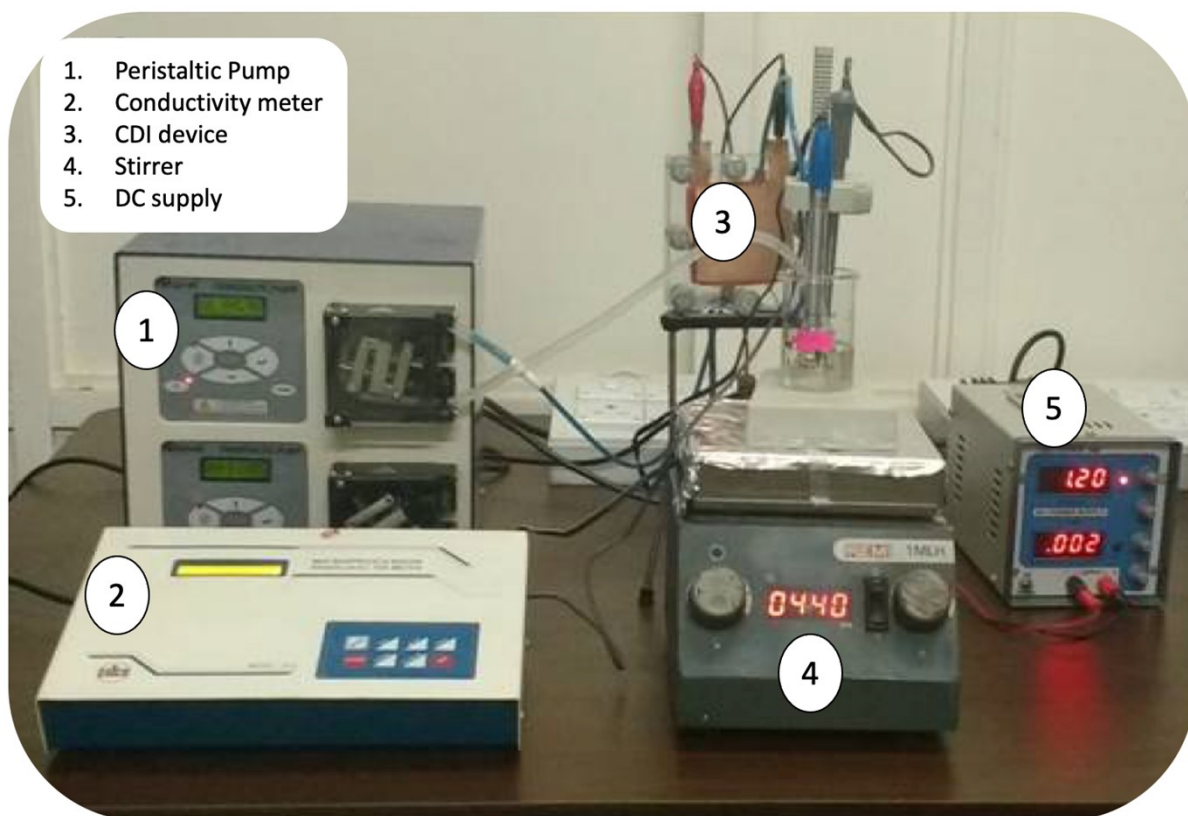

Figure S 7. Actual photograph of CDI experimentation

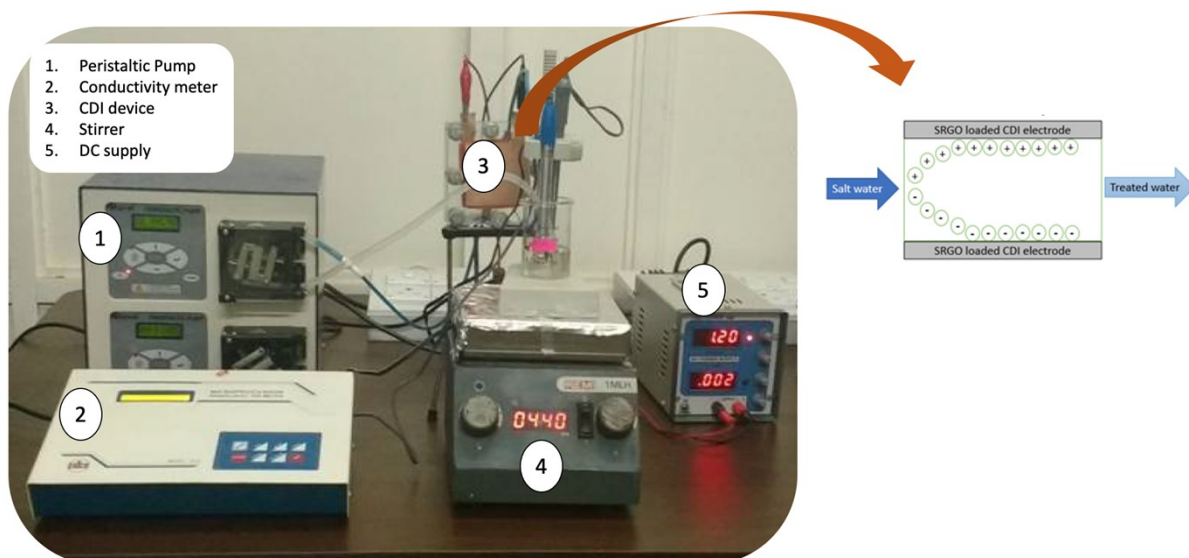

Figure S 8. Schematic diagram along with the CDI mechanism using symmetric electrode configurations

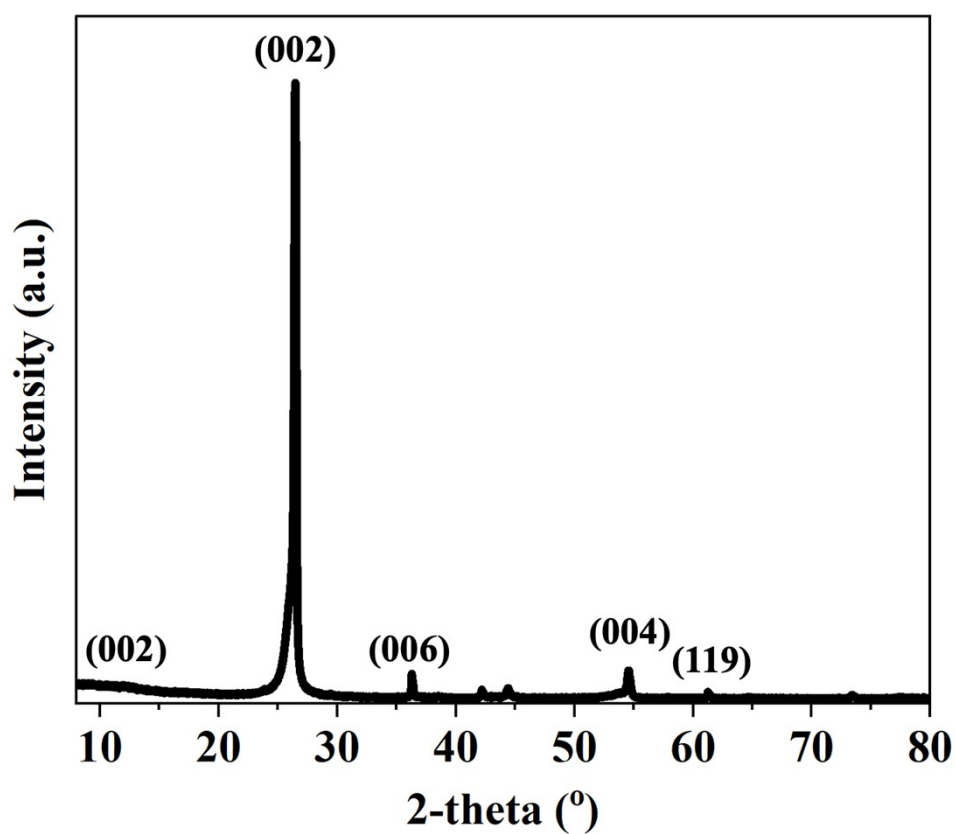

Figure S 9. XRD pattern of the CDI electrode after electroadsorption experiment

Reference

- [1] D. J. Ahirrao, S. Tambat, A. B. Pandit, and N. Jha, “Sweet-Lime-Peels-Derived Activated-Carbon-Based Electrode for Highly Efficient Supercapacitor and Flow-Through Water Desalination,” *ChemistrySelect*, vol. 4, no. 9, pp. 2610–2625, 2019, doi: 10.1002/slct.201803417.
